# Supplementary material
Source: Springer Nature journal article supplement (https://www.springermedizin.de/resource/supplementary/12889_2010_2695_MOESM4_ESM.pdf/9487162)
Supplement: MOESM4 [file 9487162]

Identification

Records identified through  
database searching  
(n = 4959)

Additional records identified  
through other sources  
(n = 3)

Screening

Records after duplicates removed  
(n = 3940)

Records screened  
(n = 3825)

Records excluded  
(n = 3780)

Eligibility

Full-text articles assessed  
for eligibility  
(n = 45)

Full-text articles excluded,  
as not mass media  
interventions  
(n = 35)

Included

Studies included in  
qualitative synthesis  
(n = 10)

Studies included in  
quantitative synthesis  
(meta-analysis)  
(n = 0)
